# Supplementary material for: Identifying super-feminine, super-masculine and sex-defining connections in the human braingraph
Source: Springer Nature journal article supplement (doi:10.1007/s11571-021-09687-w), 2021-07-15
Supplement: MOESM1 [file 19366064]

Supporting Material for the Work:  
Identifying Super-Feminine, Super-Masculine and  
Sex-Defining Connections in the Human Braingraph

László Keresztes<sup>a,\*\*</sup>, Evelin Szögi<sup>a,\*\*</sup>, Bálint Varga<sup>a</sup>, Vince Grolmusz<sup>a,b,\*</sup>

<sup>a</sup>*PIT Bioinformatics Group, Eötvös University, H-1117 Budapest, Hungary*

<sup>b</sup>*Uratim Ltd., H-1118 Budapest, Hungary*

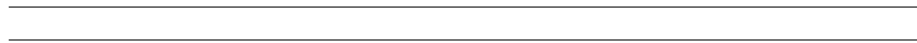

---

\*Corresponding author

\*\*Joint first authors

*Email addresses:* [keresztes@pitgroup.org](mailto:keresztes@pitgroup.org) (László Keresztes), [szogi@pitgroup.org](mailto:szogi@pitgroup.org) (Evelin Szögi), [balorkany@pitgroup.org](mailto:balorkany@pitgroup.org) (Bálint Varga), [grolmusz@pitgroup.org](mailto:grolmusz@pitgroup.org) (Vince Grolmusz)

## Supporting Figure

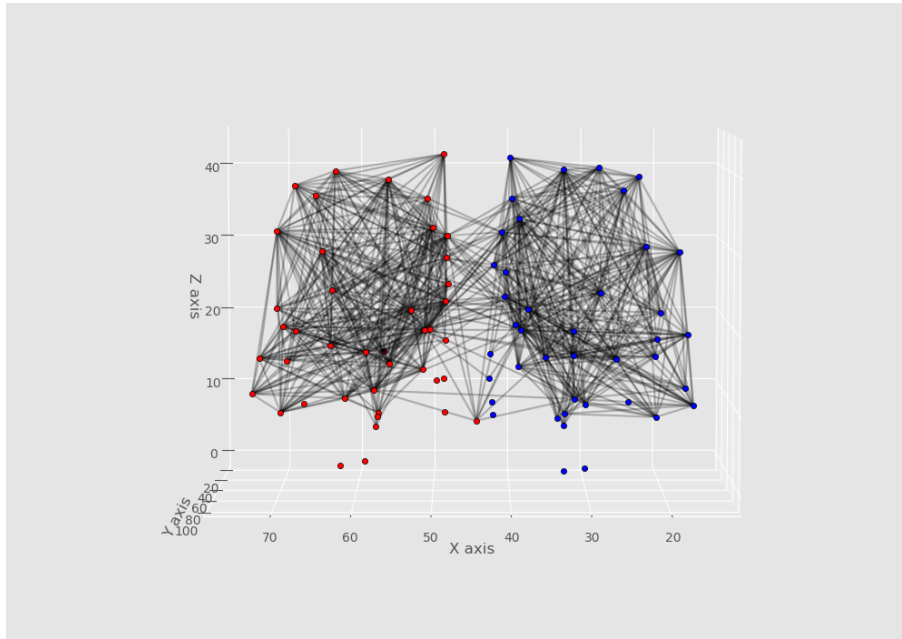

Supporting Figure 1: The braingraph of the subject of ID number 100206, with 83 vertices. The nodes from the left hemisphere are colored red, the ones from the right hemisphere are colored blue.

## Supporting Tables

### Supporting Table 1

Here we list the 102 edges we have identified characterizing the sex of the subjects. The ROIs are named according to the table given in [https://github.com/LTS5/cmp\\_nipype/blob/master/cmtklib/data/parcellation/lausanne2008/ParcellationLausanne2008.xls](https://github.com/LTS5/cmp_nipype/blob/master/cmtklib/data/parcellation/lausanne2008/ParcellationLausanne2008.xls).

- 1 (rh.precuneus, Right-Hippocampus)
- 2 (rh.caudalmiddlefrontal, Left-Hippocampus)
- 3 (rh.parahippocampal, Right-Thalamus-Proper)
- 4 (rh.parsopercularis, rh.rostralmiddlefrontal)
- 5 (rh.posteriorcingulate, rh.insula)
- 6 (rh.posteriorcingulate, rh.bankssts)
- 7 (lh.paracentral, Left-Accumbens-area)
- 8 (rh.precuneus, rh.pericalcarine)
- 9 (lh.rostralmiddlefrontal, Left-Thalamus-Proper)
- 10 (rh.insula, Right-Pallidum)

11 (rh.posteriorcingulate, Brain-Stem)  
12 (rh.inferiorparietal, rh.transversetemporal)  
13 (rh.lingual, lh.lingual)  
14 (lh.superiorparietal, Left-Caudate)  
15 (rh.precentral, lh.posteriorcingulate)  
16 (rh.parahippocampal, rh.middletemporal)  
17 (lh.rostralmiddlefrontal, lh.postcentral)  
18 (lh.precuneus, lh.pericalcarine)  
19 (rh.caudalanteriorcingulate, rh.posteriorcingulate)  
20 (lh.parsopercularis, lh.rostralmiddlefrontal)  
21 (lh.fusiform, lh.superiortemporal)  
22 (rh.inferiorparietal, rh.precuneus)  
23 (rh.superiorfrontal, Left-Putamen)  
24 (lh.caudalmiddlefrontal, Left-Pallidum)  
25 (lh.bankssts, Left-Caudate)  
26 (rh.paracentral, rh.cuneus)  
27 (rh.supramarginal, rh.bankssts)  
28 (rh.inferiorparietal, rh.insula)  
29 (rh.precentral, Brain-Stem)  
30 (Right-Hippocampus, Brain-Stem)  
31 (rh.lingual, Right-Thalamus-Proper)  
32 (lh.isthmuscingulate, lh.inferiorparietal)  
33 (rh.lateraloccipital, Right-Putamen)  
34 (lh.isthmuscingulate, lh.precuneus)  
35 (rh.pericalcarine, rh.lingual)  
36 (Right-Hippocampus, lh.supramarginal)  
37 (lh.postcentral, lh.superiortemporal)  
38 (rh.superiorparietal, rh.inferiorparietal)  
39 (lh.superiorparietal, Left-Thalamus-Proper)  
40 (lh.supramarginal, lh.superiorparietal)  
41 (rh.superiorparietal, Right-Caudate)  
42 (rh.middletemporal, Right-Hippocampus)  
43 (lh.pericalcarine, lh.inferiortemporal)  
44 (lh.posteriorcingulate, lh.supramarginal)  
45 (lh.transversetemporal, Left-Thalamus-Proper)  
46 (rh.precentral, rh.middletemporal)  
47 (rh.precentral, rh.postcentral)  
48 (rh.rostralmiddlefrontal, lh.posteriorcingulate)  
49 (rh.isthmuscingulate, rh.pericalcarine)  
50 (lh.superiorparietal, lh.inferiorparietal)  
51 (rh.caudalanteriorcingulate, lh.parsopercularis)  
52 (lh.inferiorparietal, lh.bankssts)  
53 (rh.parstriangularis, rh.parsopercularis)  
54 (rh.insula, Brain-Stem)  
55 (rh.precuneus, Right-Putamen)  
56 (lh.paracentral, lh.middletemporal)

57 (rh.parstriangularis, rh.superiorparietal)  
58 (lh.inferiortemporal, Left-Pallidum)  
59 (rh.postcentral, rh.transversetemporal)  
60 (lh.caudalanteriorcingulate, Left-Pallidum)  
61 (rh.isthmuscingulate, Right-Caudate)  
62 (lh.fusiform, Left-Hippocampus)  
63 (Left-Caudate, Left-Putamen)  
64 (rh.lateralorbitofrontal, Right-Pallidum)  
65 (rh.superiorparietal, rh.bankssts)  
66 (lh.precentral, Left-Putamen)  
67 (lh.bankssts, Brain-Stem)  
68 (rh.precuneus, rh.lateraloccipital)  
69 (lh.caudalanteriorcingulate, lh.inferiorparietal)  
70 (Right-Putamen, Right-Accumbens-area)  
71 (lh.lingual, lh.parahippocampal)  
72 (Right-Pallidum, lh.caudalmiddlefrontal)  
73 (Right-Thalamus-Proper, Right-Pallidum)  
74 (rh.superiorfrontal, rh.paracentral)  
75 (rh.rostralanteriorcingulate, Right-Thalamus-Proper)  
76 (lh.lateraloccipital, lh.bankssts)  
77 (lh.caudalanteriorcingulate, Left-Caudate)  
78 (rh.supramarginal, rh.transversetemporal)  
79 (lh.superiorfrontal, lh.supramarginal)  
80 (lh.cuneus, Left-Pallidum)  
81 (rh.fusiform, rh.inferiortemporal)  
82 (rh.inferiorparietal, Right-Pallidum)  
83 (rh.rostralmiddlefrontal, Right-Putamen)  
84 (lh.superiorfrontal, lh.lateraloccipital)  
85 (rh.medialorbitofrontal, rh.parstriangularis)  
86 (lh.precentral, lh.supramarginal)  
87 (rh.transversetemporal, Right-Hippocampus)  
88 (Right-Thalamus-Proper, lh.lateraloccipital)  
89 (rh.posteriorcingulate, lh.caudalanteriorcingulate)  
90 (rh.inferiorparietal, Left-Hippocampus)  
91 (Right-Accumbens-area, lh.precentral)  
92 (rh.pericalcarine, rh.transversetemporal)  
93 (lh.parahippocampal, lh.transversetemporal)  
94 (rh.posteriorcingulate, rh.isthmuscingulate)  
95 (rh.rostralanteriorcingulate, Right-Caudate)  
96 (lh.lingual, Left-Thalamus-Proper)  
97 (rh.postcentral, rh.cuneus)  
98 (rh.caudalmiddlefrontal, Right-Pallidum)  
99 (lh.postcentral, Left-Pallidum)  
100 (lh.superiorfrontal, Left-Caudate)  
101 (rh.precuneus, Right-Amygdala)  
102 (rh.precuneus, rh.inferiortemporal)

## Supporting Table 2

Here we list the numerical values of the coefficients of the linear expression  $w \cdot x + b$ , which satisfies

$$w \cdot x + b > 0$$

for all  $x$ , corresponding to a female braingraph, and

$$w \cdot x + b < 0$$

for all  $x$ , corresponding to a male braingraph.

The number  $b = -6.038549870659588237e+01$ . The coordinates of the 102-dimensional vector  $w$ , in the same order as the edges are listed in Supporting Table 1:

|    |                           |
|----|---------------------------|
| 1  | 3.140827577736224896e+01  |
| 2  | -4.224516926777828019e+01 |
| 3  | -5.534731949947487095e+01 |
| 4  | -5.021383798706737167e+01 |
| 5  | 3.338868535424175121e+01  |
| 6  | -6.441754383644450854e+01 |
| 7  | -9.137204014740284208e+00 |
| 8  | -1.623199041116811969e+01 |
| 9  | -1.404986301933692516e+02 |
| 10 | -4.006330872545306221e+01 |
| 11 | -4.252783335733649039e+01 |
| 12 | 4.178817508618046617e+01  |
| 13 | 4.372649839601213984e+01  |
| 14 | 4.490601147649471869e+01  |
| 15 | 4.707127337369107067e+01  |
| 16 | -3.636412443899504154e+01 |
| 17 | 7.015011711412499551e+01  |
| 18 | 4.336665095022959093e+01  |
| 19 | -7.814457117294969635e+01 |
| 20 | -4.214089662663334934e+01 |
| 21 | 2.128444054185646195e+01  |
| 22 | 3.312373784233776774e+01  |
| 23 | 1.639952878714990732e+02  |
| 24 | 3.026734348412119502e+01  |
| 25 | 6.268856306230090070e+01  |
| 26 | -4.715689733082451340e+01 |
| 27 | 2.432515011860931509e+01  |
| 28 | -3.448165961059984852e+01 |
| 29 | 3.340173045666283969e+01  |
| 30 | 4.042781804276076230e+01  |
| 31 | 2.761020298703500586e+01  |
| 32 | 2.402973906860708198e+01  |

33 5.799632593673756986e+01  
34 2.811207336490517150e+01  
35 -3.530994163115634166e+01  
36 -1.569561312762774605e+02  
37 7.724860503993652117e+01  
38 -2.206056231378179433e+01  
39 2.931487757932982774e+01  
40 -2.102330615674154757e+01  
41 2.327980794756512850e+01  
42 7.887033703905483151e+01  
43 -1.652915811375330790e+01  
44 2.233205680678592842e+01  
45 -3.287713377723386543e+01  
46 3.098515708552118397e+01  
47 4.994991466114837664e+01  
48 -1.208699629202809689e+01  
49 -3.915248510214356514e+01  
50 -3.627962519972498256e+01  
51 -2.723952954348446909e+01  
52 -4.192812642391789524e+01  
53 -2.172699471903166213e+01  
54 -5.976128513966504840e+01  
55 6.259311751749017816e+01  
56 3.402550885586439477e+01  
57 2.210190354984765690e+02  
58 -3.676412998508114072e+01  
59 -8.721544084472516545e+01  
60 3.913733184781763441e+01  
61 3.834602562855815222e+01  
62 3.638168347536320368e+01  
63 4.718280018698974487e+01  
64 3.251867640180642383e+01  
65 4.918992981007945531e+01  
66 -2.066292878945655787e+01  
67 -4.066693930915500488e+01  
68 -2.157875932254564333e+01  
69 7.650679496763183352e+01  
70 4.825588522618672727e+01  
71 4.970415751004980365e+01  
72 7.295806396686961648e+01  
73 -2.882074964324494104e+01  
74 3.025214670489702584e+01  
75 7.39275141289777641e+01  
76 3.849139711312415812e+01  
77 -2.672208728717341941e+01  
78 -7.607620421231430896e+01

```

79 -6.393366605226245980e+01
80 2.138202760440539052e+01
81 -3.614660559000751761e+01
82 2.635867128635015533e+01
83 7.575343108027709604e+01
84 4.491884096447378738e+01
85 9.919165525049973553e+01
86 2.689606565844382047e+01
87 -4.580873022162855079e+01
88 3.428996344958203935e+01
89 2.134704175565022766e+01
90 -1.729583819036137982e+01
91 5.079962213472451538e+01
92 5.934224772754128452e+01
93 5.915239459823803259e+01
94 1.812222940561209938e+01
95 5.407256405097979979e+01
96 4.579401150729591308e+01
97 7.263014051692987039e+01
98 2.971896563339183928e+01
99 6.289375521391245627e+01
100 -4.140460314388891305e+01
101 -4.235611871509448179e+01
102 4.713752575052093619e+01

```

## Program Codes

### Program Code 1

```

def drop_by_weight(features, rate=0.2, rate_divisor=1.2):
    tmp_features = features
    while True:
        x_ = x[:, tmp_features]
        clf = LinearSVC(random_state=0, tol=1e-5)
        clf.fit(x_, y)
        y_clf = clf.predict(x_)
        if np.array_equal(y, y_clf):
            features = tmp_features
            w_abs = np.sort(np.abs(clf.coef_[0]))
            threshold = w_abs[int(rate * len(w_abs))]
            tmp_features = [f for f in features if
                np.abs(clf.coef_[0, features.index(f)]) > threshold]
        else:
            rate_threshold = float(1)/len(features)
            if rate > rate_threshold:
                tmp_features = features

```

```
        rate = max(float(rate)/rate_divisor, rate_threshold)
    else:
        break

    return features
```

## Program Code 2

```
def drop_one(features):
    while True:
        fl = len(features)
        random.shuffle(features)
        for feature in features:
            clf = LinearSVC(random_state=0, tol=1e-5)
            tmp_features = list(features)
            tmp_features.remove(feature)
            clf.fit(x[:, tmp_features], y)
            y_clf = clf.predict(x[:, tmp_features])
            if np.array_equal(y, y_clf):
                features.remove(feature)
                break
        if len(features) == fl:
            break
    return features
```
